# Supplementary material
Source: PubMed Central journal article supplement (PMC9515334)
Supplement: mmc1.pdf [file mmc1.pdf]

**Cell Host & Microbe, Volume 30**

**Supplemental information**

**Evasion of neutralizing antibody**

**responses by the SARS-CoV-2 BA.2.75 variant**

**Panke Qu, John P. Evans, Yi-Min Zheng, Claire Carlin, Linda J. Saif, Eugene M. Oltz, Kai Xu, Richard J. Gumina, and Shan-Lu Liu**

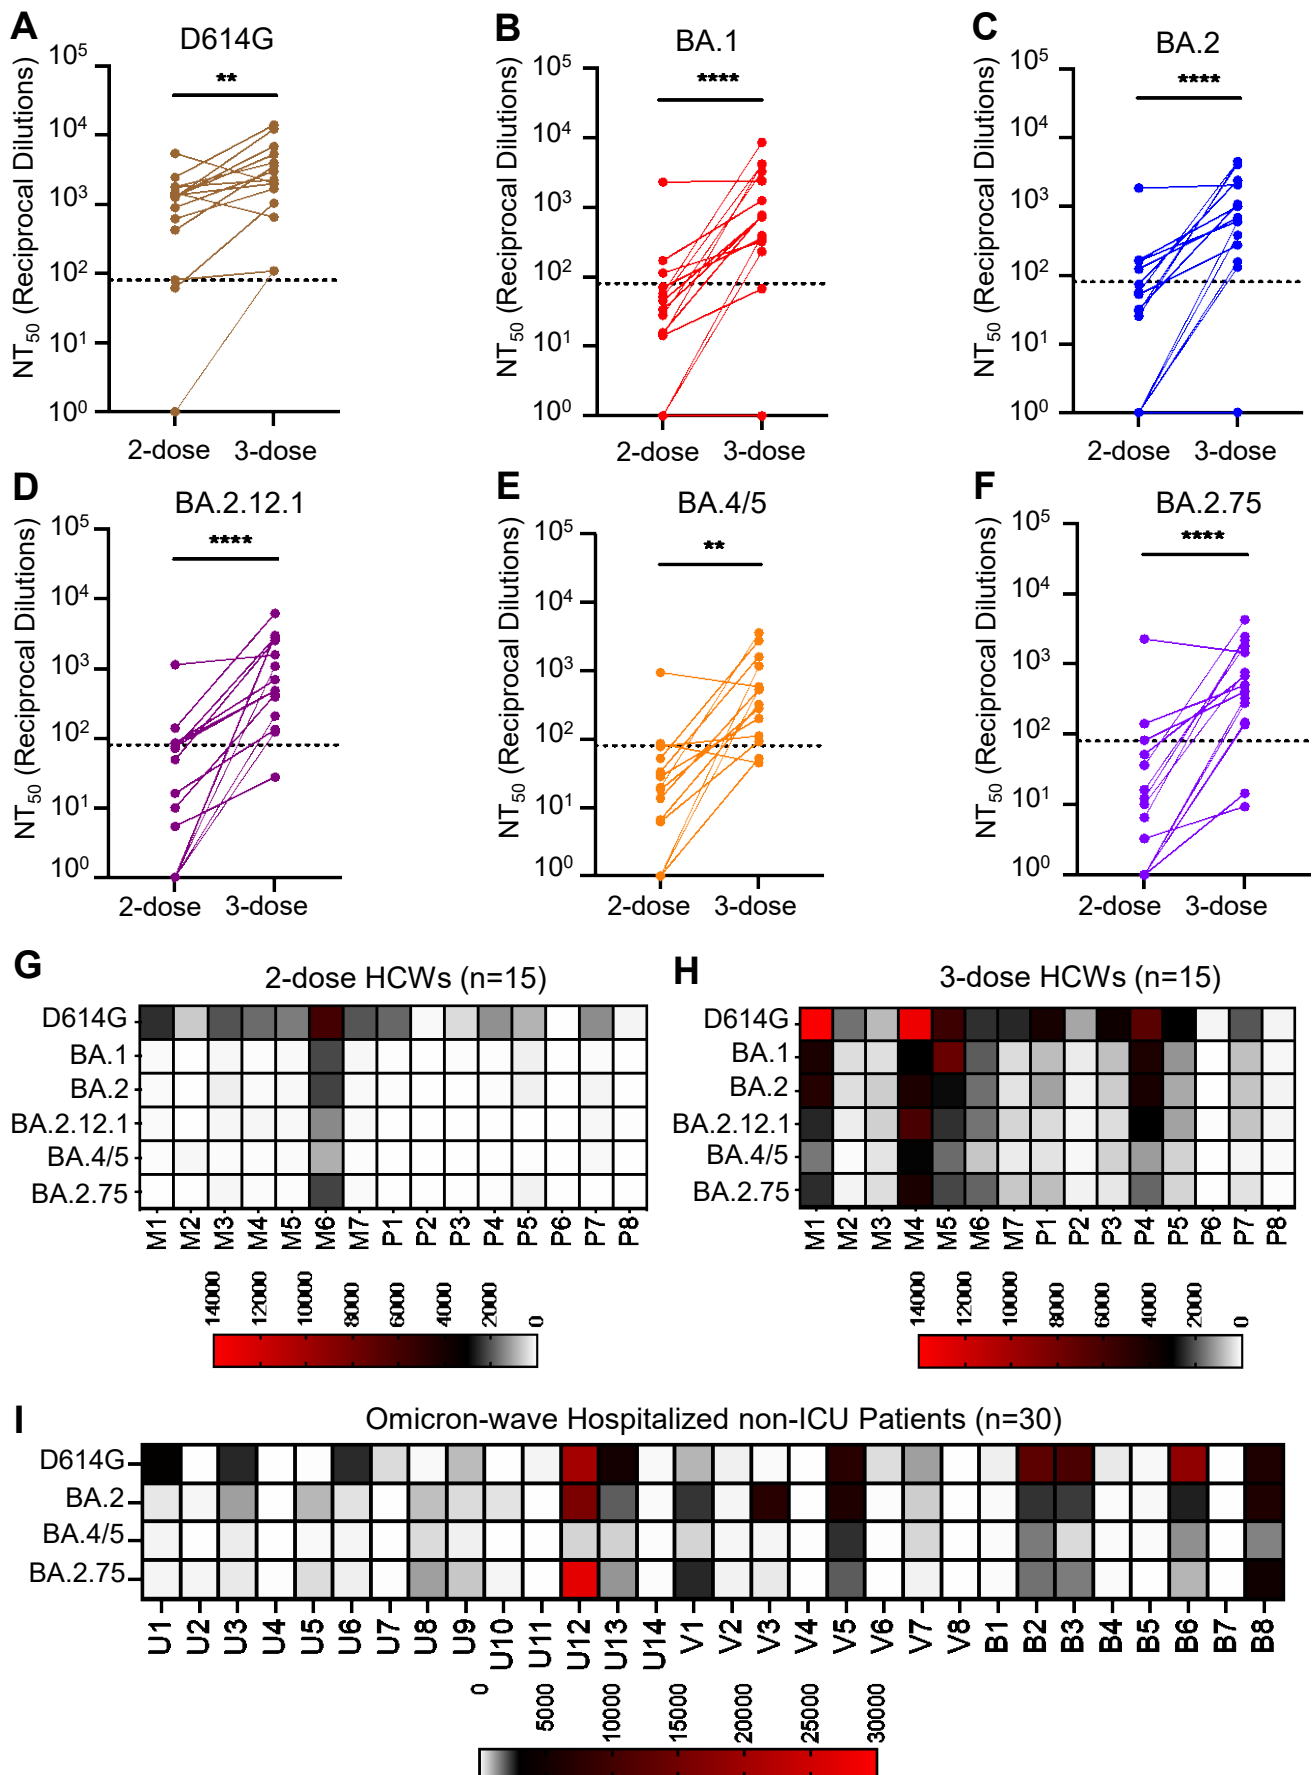

**Figure S1: Neutralization of Omicron subvariants by vaccinee and COVID-19 patient sera, related to Figure 1. (A-F)** Comparison of the neutralizing antibody titers in HCWs between 2-dose and 3-dose booster mRNA vaccination against the D614G (A), BA.1 (B), BA.2 (C), BA.2.12.1 (D), BA.4/5 (E), and BA.2.75 (F) variants. Lines connect samples from the same HCW, the dotted lines represent the limit of quantification (NT<sub>50</sub> = 80), and significance was determined by paired, two-tailed Student's t

test with Welch's correction. (**G-I**) Heatmaps display the nAb titers for HCWs 3-4 weeks after second mRNA vaccine dose (G), 1-12 weeks after mRNA vaccine booster dose (H), and for hospitalized Omicron wave COVID-19 patients (I). HCWs are indicated as 'M' for Moderna mRNA-1273 vaccinated or 'P' for Pfizer/BioNTech BNT162b2 vaccinated, and Omicron wave patients are indicated as 'U' for unvaccinated, 'V' for 2-dose vaccinated, and 'B' for vaccinated and boosted. P-values are represented as \*\* $p < 0.01$  and \*\*\*\* $p < 0.0001$ .

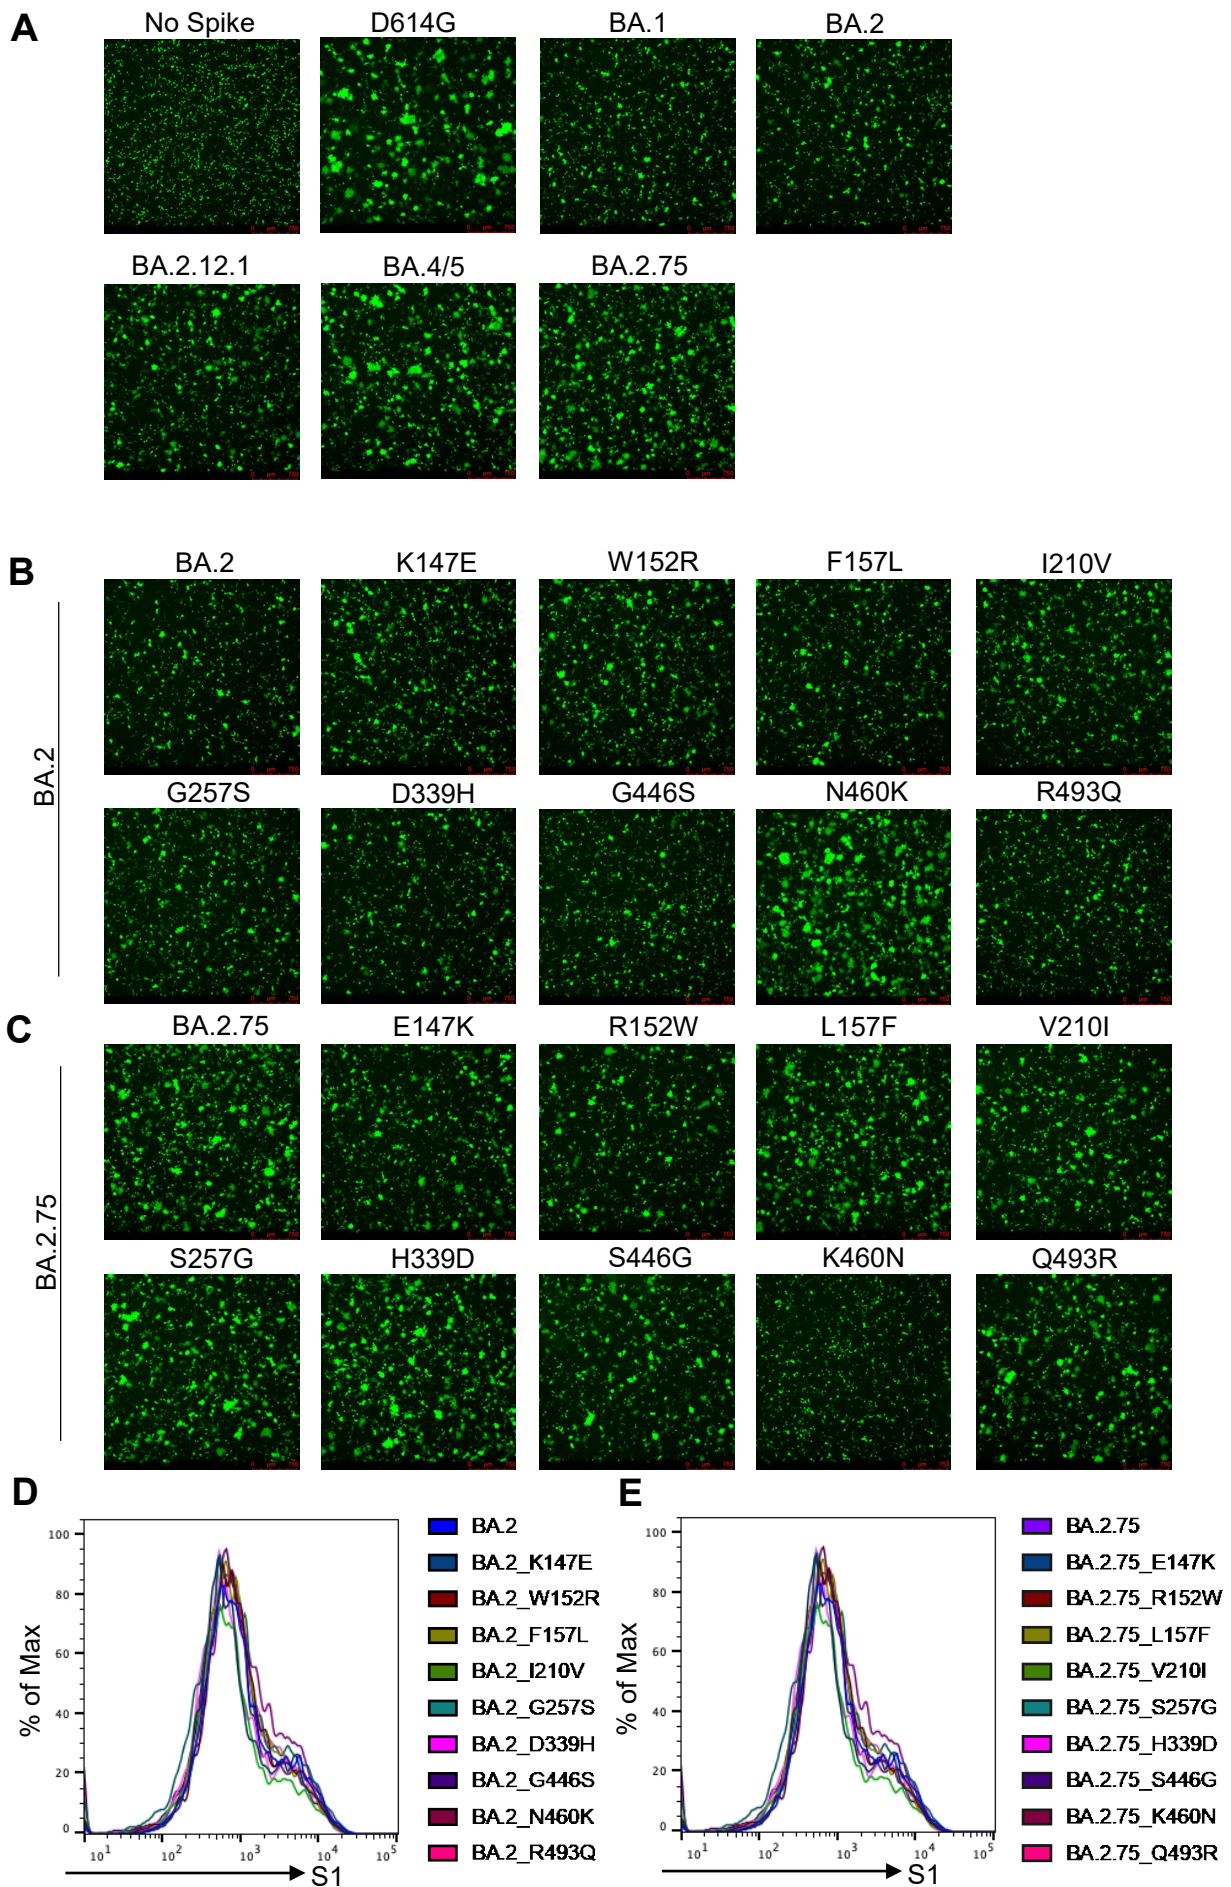

displaying syncytia formation are presented for HEK293T-ACE2 cells 24 hr after co-transfection with a GFP expression construct and SARS-CoV-2 variant S proteins (A), BA.2 single mutants S proteins (B), or BA.2.75 single reversion mutant S proteins (C). Scale bars represent 150  $\mu\text{m}$ . **(D-E)** Histograms of surface staining with anti-S1 antibody of HEK293T cells expressing S proteins from BA.2 with single mutations from BA.2.75 lineage defining mutations (D) and from BA.2.75 with single reversion mutations from BA.2.75 lineage defining mutations (E).

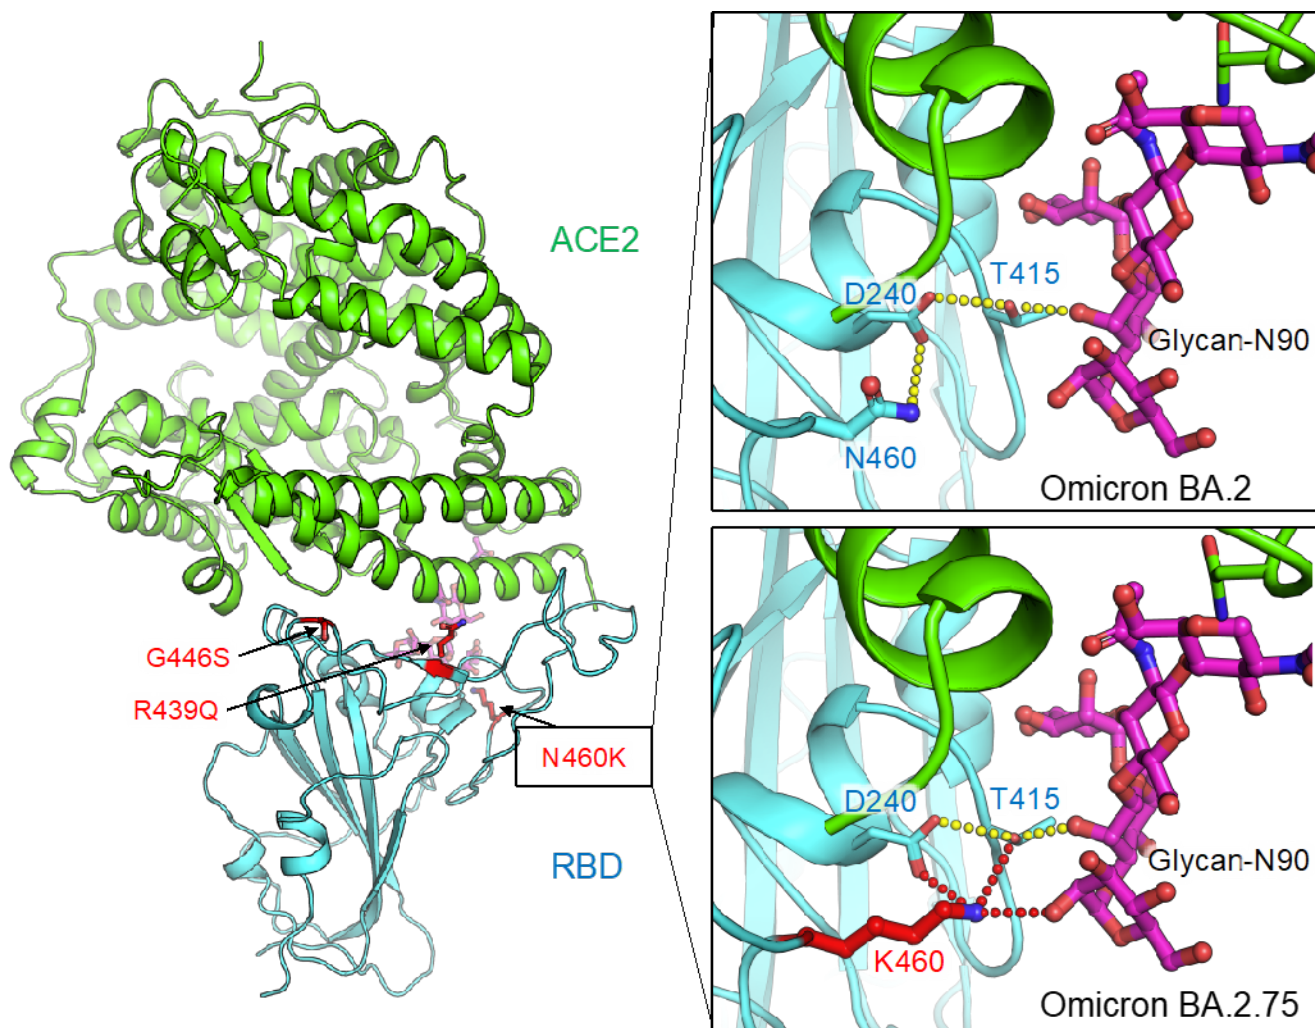

**Figure S3: Structural modeling of SARS-CoV2 Omicron BA.2.75 RBD-ACE2 complex, related to Figure 4.** Structural homology model of Omicron BA.2.75 RBD-ACE2 complex viewed as ribbon. Upper inset: The RBD residues N460-D240-T415 and hACE2 glycan N-90 form hydrogen bond network. Lower inset: the mutation N460K enhances this hydrophilic interaction network by forming salt-bridge with D240 and two additional hydrogen bonds with T415 and glycan-N90 on hACE2. Hydrogen bonds and salt bridges were shown as dashes and colored in yellow (present in BA.2) and red (present only in BA.2.75).
